# Supplementary material for: Synthesis and electrochemical behaviors of layered Na0.67[Mn0.65Co0.2Ni0.15]O2 microflakes as a stable cathode material for sodium-ion batteries
Source: Royal Society of Chemistry journal article supplement (doi:10.1039/c3ta01430d), 2013-01-01
Supplement: c3ta01430d.pdf [file c3ta01430d.pdf]

Supplementary Material (ESI) for Journal of Materials Chemistry A

## Synthesis and electrochemical behaviors of layered $\text{Na}_{0.67}[\text{Mn}_{0.65}\text{Co}_{0.2}\text{Ni}_{0.15}]\text{O}_2$ microflakes as a stable cathode material for sodium-ion batteries

Dingding Yuan,<sup>a</sup> Wei He,<sup>b</sup> Jiangfeng Qian<sup>b</sup>, Yuliang Cao,<sup>\*a</sup> Xinping Ai<sup>b</sup> and Hanxi Yang<sup>\*b</sup>

<sup>a</sup> Hubei Key Lab. of Electrochemical Power Sources, College of Chemistry and Molecular Science, Wuhan University, China. E-mail: ylcao@whu.edu.cn;

<sup>b</sup> College of Chemistry and Molecular Sciences, Wuhan university, Wuhan 430072, China. Tel: 86-027-68754526; E-mail: hxyang@whu.edu.cn

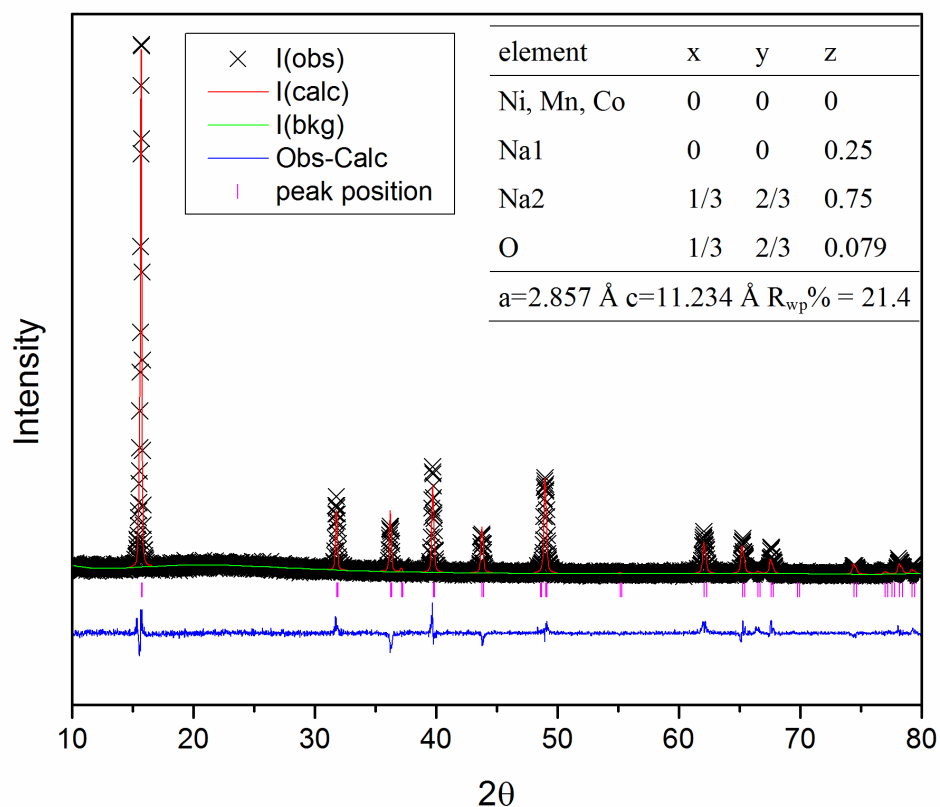

**Figure S1.** X-ray diffraction results and Rietveld refinement of P2-NaMNC

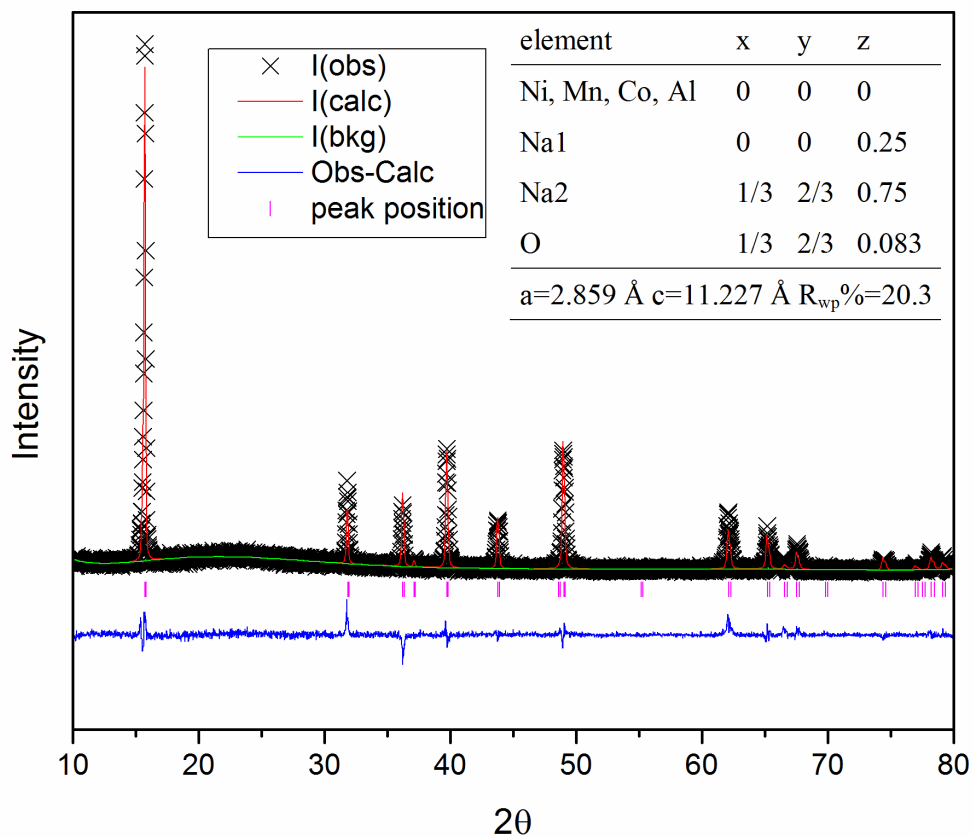

**Figure S2.** X-ray diffraction results and Rietveld refinement of P2-NaMNCA
